1  
2  
3  
4  
5  
6  
7  
8  
9  
10  
11  
12  
13  
14  
15  
16  
17  
18  
19  
20  
21  
22  
23  
24  
25

**Calcium/calmodulin-dependent protein kinase II regulates mammalian axon growth by affecting F-actin length in growth cone**

Feng Xi<sup>1#</sup>, Ren-Jie Xu<sup>1,2#</sup>, Jin-Hui Xu<sup>1</sup>, Wei-Hua Wang<sup>1</sup>, Jin-Jin Ma<sup>1</sup>, Feng Wang<sup>1</sup>, Yan-Xia Ma<sup>1</sup>, Shi-Bin Qi<sup>1</sup>, Jing-Cheng Zhang<sup>1</sup>, Hao-Nan, Zhang<sup>1</sup>, Xu-Zhen, Qin<sup>1</sup>, Jian-Quan Chen<sup>1</sup>, Bin Li<sup>1</sup>, Chang-Mei Liu<sup>3,4</sup>, Hui-Lin Yang<sup>1</sup>, Bin Meng<sup>1</sup> and Saijilafu<sup>1\*</sup>

<sup>1</sup>*Department of Orthopaedics, the First Affiliated Hospital, Orthopaedic Institute, Soochow University, Suzhou, P.R.China, 215007.*

<sup>2</sup>*Department of Orthopaedics, Suzhou Municipal Hospital/the Affiliated Hospital of Nanjing Medical University, Suzhou, Jiangsu, China*

<sup>3</sup>*State Key Laboratory of Stem Cell and Reproductive Biology, Institute of Zoology, Chinese Academy of Science, Beijing, China*

<sup>4</sup>*Savaid Medical School, University of Chinese Academy of Sciences, Beijing, China*

Running title: CaMKII regulates axon growth

#these persons contributed equally

\*Correspondence: Saijilafu, MD, Ph.D.

Phone: 0512-6778-0762

Email: [saijilafu@suda.edu.cn](mailto:saijilafu@suda.edu.cn)

26 **Abstract:**

27 While axon regeneration is a key determinant of functional recovery of the nervous system  
28 after injury, it is often poor in the mature nervous system. Influx of extracellular calcium ( $\text{Ca}^{2+}$ )  
29 is one of the first phenomena that occur following axonal injury, and  
30 calcium/calmodulin-dependent protein kinase (CaMKII), a target protein for calcium ions,  
31 regulates the status of cytoskeletal proteins such as F-actin. Herein, we found that peripheral  
32 axotomy activates CaMKII in dorsal root ganglion (DRG) sensory neurons, and inhibition of  
33 CaMKII impairs axon growth in both the peripheral and central nervous systems (PNS and CNS,  
34 respectively). Most importantly, we also found that activation of CaMKII promotes PNS and  
35 CNS axon growth, and regulatory effects of CaMKII on axon growth occur via affecting the  
36 length of the F-actin. Thus, we believe our findings provide clear evidence that CaMKII is a  
37 critical modulator of mammalian axon regeneration.

38

39

40 **Key words:** axon growth; CaMKII; sensory neurons; cytoskeleton; F-actin

41

42

43

44

45

46

47

48

49

50

51

## 52 **Introduction**

53 Failure of axonal regeneration in the damaged mammalian nervous system is the main  
54 impediment to its functional recovery. However, injured axons of the adult central nervous  
55 system (CNS) cannot regenerate spontaneously owing to their poor capacity of intrinsic axon  
56 growth and the inhibitory microenvironment. Compared to the CNS neurons, axons of the  
57 peripheral nervous system (PNS) neurons can partly regenerate after injury; however, its  
58 functional outcome is often poor, especially in humans, resulting in proximal lesions. This is  
59 largely because of atrophic changes in chronically denervated Schwann cells in distal nerves and  
60 target atrophy [1]. Therefore, the rate of axon growth is a major limitation in functional recovery  
61 of the injured nervous system. Understandably, most studies concerning axon regeneration in the  
62 past few decades have focused on ways to antagonize the effects of inhibitory molecules and/or  
63 activate the intrinsic axon growth capacity of adult neurons [2-6]. However, thus far, little  
64 attention has been paid to enhance the rate of axon regeneration by modulating the local axonal  
65 cytoskeleton assembly at the growth cone—where axon growth actually occurs. Additionally,  
66 increasing evidence has shown that long-distance axon regeneration is achieved by regulating the  
67 cytoskeletal elements at the nerve growth cone [7-11]. Thus, modulation of the cytoskeletal  
68 protein assembly in the growth cone may be an effective strategy to promote axon regeneration  
69 in the damaged nervous system.

70 Calcium/calmodulin-dependent protein kinase II (CaMKII) is the most conventional member  
71 of the CaMK family that regulates a series of functions in the nervous system, such as  
72 neurotransmitter synthesis/release, synaptic plasticity, learning, and memory. Four isoforms of  
73 CaMKII are expressed in the nervous system:  $\alpha$ ,  $\beta$ ,  $\gamma$ , and  $\delta$ ; among these, the  $\gamma$  isoform is most  
74 abundantly expressed in the dorsal root ganglion (DRG) neurons; while isoforms  $\alpha$  and  $\beta$  are  
75 primarily expressed in the brain [12]. Calcium/calmodulin can bind to CaMKII and activate it  
76 through autonomous phosphorylation and subsequently sustain its kinase activity [13]. A  
77 previous study demonstrated that calcium influx occurred immediately after axonal damage;

78 furthermore, this calcium influx plays key roles subsequent to axonal growth [14]. In addition,  
79 another study showed that overexpression of CaMKII promotes neurite outgrowth from neuro2a  
80 and NG108-15 neuroblastoma cells [15]. Moreover, CaMKII activity is also specifically required  
81 for NCAM, and N-cadherin-induced neurite outgrowth [16]. Thus, it is likely that CaMKII  
82 protein could regulate mammalian axon regeneration; however, to our best knowledge, the  
83 functional role of CaMKII on primary neuronal axon regeneration has not yet been studied.

84 Herein, we found that the phosphorylation level of CaMKII in DRG sensory neurons was  
85 increased because of peripheral nerve injury. Moreover, the pharmacological inhibition of  
86 CaMKII activity or genetic knockdown of CaMKII $\gamma$  with a specific siRNA blocks axon growth  
87 in DRG sensory neurons and developing CNS neurons. By contrast, the pharmacological  
88 activation of CaMKII with CdCl<sub>2</sub> enhances the axon growth of DRG sensory neurons and  
89 developing CNS neurons. Additionally, we found that inhibition of CaMKII activity reduces the  
90 F-actin length in the growth cone, and the activation of CaMKII increases the F-actin length.  
91 Taken together, these findings provide clear evidence that CaMKII is a critical modulator of  
92 mammalian axon regeneration.

93  
94  
95  
96  
97  
98  
99  
100  
101  
102  
103

## 104 **Results**

### 105 **1. Peripheral axotomy increases the phosphorylation level of CaMKII in DRG neurons**

106 Previous studies have shown that axonal injury induces  $\text{Ca}^{2+}$  influx at the lesion site [17], and  
107 calcium/calmodulin binds to CaMKII to activate it by autonomous phosphorylation. Thus, we  
108 first examined the phosphorylation levels of CaMKII in DRG neurons after sciatic nerve  
109 axotomy. Immunohistochemical staining performed three days after the nerve injury showed  
110 elevated phosphorylation levels of CaMKII in the DRG neurons compared to the naïve DRG  
111 neurons (Fig. 1A). In addition, western blot data also further confirmed that the level of  
112 phosphorylated CaMKII protein was also increased after sciatic nerve injury (Fig. 1B, C),  
113 indicating that peripheral axotomy activates the CaMKII signaling pathway in peripheral sensory  
114 neurons.

115

### 116 **2. Inhibition of CaMKII activity prevents axon growth from adult DRG neurons**

117 Next, we investigated the functional role of CaMKII on axon regeneration. Dissociated DRG  
118 neurons from adult mice were treated with DMSO and either 2.5 or 5.0  $\mu\text{M}$  KN93—a specific  
119 CaMKII inhibitor—and cultured for 3 days. When the phosphorylation level of CaMKII was  
120 effectively blocked by KN93 (Fig. 2A, B), the regenerative axon growth from KN93 treatment  
121 group was significantly shorter than the control group (Fig. 2C, D). To confirm the  
122 pharmacological results, we knocked down CaMKII $\gamma$  expression using specific siRNAs in the  
123 cultured DRG sensory neurons. Among four isoforms of CaMKII, the  $\gamma$  isoform is abundantly  
124 expressed in DRG neurons. Our western blot results also showed that siRNA against the  $\gamma$   
125 isoform efficiently suppressed CaMKII expression in the DRG neurons (Fig. 2E, F). Furthermore,  
126 consistent with pharmacological results, gene silencing of CaMKII $\gamma$  expression with specific  
127 siRNA dramatically inhibited regenerative axon growth of DRG neurons (Fig. 2G, H).

128

### 129 **3. CaMKII $\gamma$ knockdown inhibits peripheral sensory axon regeneration in vivo**

130 To further explore the roles of CaMKII on axon regeneration in vivo, we used in vivo DRG  
131 electroporation technique to introduce si-CaMKII $\gamma$  plus EGFP into adult mouse lumbar (L) 4/5  
132 DRG neurons. Two days later, the ipsilateral sciatic nerve was crushed using fine forceps. As  
133 described in our previous study, three days after the sciatic nerve injury, the axon regeneration  
134 was assessed in whole mount flattened nerve [18]. All EGFP-labeled axons were then manually  
135 traced from the lesion site to the distal axonal tip to measure the accurate length of the  
136 regenerating axon. Consistent with our in vitro results, the axon regeneration was significantly  
137 impaired by siCaMKII $\gamma$  (Fig. 3A-C), thereby indicating that the activity of CaMKII is required  
138 for peripheral axon regeneration in vivo.

139

#### 140 **4. CaMKII activity regulates axon growth of embryonic cortical and hippocampal neurons**

141 Typically, intrinsic axon regeneration ability of the CNS and PNS neurons is different. Therefore,  
142 we questioned whether CaMKII regulates the axon regeneration ability of CNS neurons. To test  
143 this hypothesis, we treated E14.5 cortical and E18 hippocampal neurons with DMSO or 2.5  $\mu$ M  
144 KN93 for three days. Similarly, treatment of KN93 induced significant axon growth inhibition in  
145 both cortical and hippocampal neurons (Fig. 4A-D). To further confirm the pharmacological  
146 inhibitor results, we used a specific siRNA against CaMKII $\gamma$  to knock down CaMKII $\gamma$   
147 expression in the E14.5 cortical and E18 hippocampal neurons. In line with the results of  
148 pharmacological inhibition results, siCaMKII $\gamma$  transfection also markedly inhibited both cortical  
149 and hippocampal neuronal axon growth (Fig. 4E-H). Taken together, these results suggest that  
150 CaMKII activity is required for CNS axon growth as well.

151

#### 152 **5. Activation of CaMKII with CdCl<sub>2</sub> promotes axon growth in adult DRG neurons and** 153 **embryonic CNS neurons**

154 A previous study showed that cadmium ions could activate CaMKII in mesangial cells [19].  
155 Consistent with that, we too found that treatment with 10.0  $\mu$ M CdCl<sub>2</sub> significantly increased the

156 expression level of phosphorylated CaMKII in cultured DRG neurons (Fig. 5A, B). Hence, we  
157 further examined whether activation of CaMKII with CdCl<sub>2</sub> regulates the vitro axon growth.  
158 Interestingly, our results showed that CdCl<sub>2</sub> could significantly promote the axon growth in adult  
159 DRG neurons. Similarly, we also found that treatment of CdCl<sub>2</sub> promotes embryonic cortical (Fig.  
160 5E, F) and hippocampal neuronal axon growth (Fig. 5G, H). Thus, these results indicate that  
161 activation of CaMKII sufficiently promotes neuronal axon growth in the adult PNS and  
162 developing CNS, in vitro.

163

## 164 **6. Activation of CaMKII with CdCl<sub>2</sub> prevents injury-induced axon retraction of the cortical** 165 **spinal tract**

166 Axons of the cortical spinal tract retract in response to spinal cord injury, and subsequently form  
167 retraction bulbs [20-23]. Our cell culture results indicate that activation of CaMKII with CdCl<sub>2</sub>  
168 promotes axon growth in embryonic CNS and adult PNS. Thus, we further examined whether  
169 activation of CaMKII with CdCl<sub>2</sub> promotes in vivo axon regeneration by using a spinal cord  
170 injury model. After spinal cord crush injury was established at the T8 level, 1.0 mg/kg CdCl<sub>2</sub> was  
171 intraperitoneally injected every day for 4 weeks. We found that injection of CdCl<sub>2</sub> could prevent  
172 injury-induced axon retraction of the cortical spinal tract (Fig. 6A, B). Unfortunately, however,  
173 we did not observe any regenerating axons beyond the lesion site in the spinal cord. Thus,  
174 although these results indicate that activation of CaMKII could prevent injury-induced axon  
175 retraction, it is difficult to further promote axon regeneration across the lesion site in the injured  
176 spinal cord.

177

## 178 **7. CaMKII activity inhibition prevents axotomy-induced transcription independent of axon** 179 **growth**

180 Previously, we developed the culture-and-replating method to investigate whether regenerative  
181 axon growth is gene transcription-dependent or local cytoskeleton assembly-dependent [18].

182 Using this model system, we further investigated whether the regulatory effect of CaMKII on  
183 axon growth is gene transcription-dependent or growth cone cytoskeleton assembly-dependent.  
184 Adult DRG neurons were dissociated and cultured for 3 days, following which these  
185 three-day-cultured neurons were suspended and replated to initiate axon growth anew.  
186 Interestingly, we found that neurons treated with KN93 during the initial three-day-culture period  
187 had no effect on newly growing axons after replating (Fig. 7A, B). However, axon growth from  
188 neurons that were treated with KN93 after replating was significantly blocked (Fig. 7A, B). This  
189 result indicates that KN93 mainly inhibits local cytoskeleton assembly-dependent axon growth.  
190 On the other hand, ours and others' previous studies have shown that peripheral axotomy  
191 switches the sensory neurons into a regeneration mode, and this peripheral axotomy-induced  
192 axon growth is mainly dependent on growth cone cytoskeleton assembly [18]. Thus, adult mice  
193 were first subjected to sciatic nerve transection, and seven days after the nerve injury, the L4/L5  
194 DRGs were dissected and cultured for 24 h in vitro with KN93 treatment. In line with the results  
195 of the culture-and-replating method, we found the KN93 also blocks peripheral axotomy-induced  
196 cytoskeleton assembly-dependent axon growth of DRG neurons (Fig. 7C, D). Together, our data  
197 showed that CaMKII mainly regulates local cytoskeleton assembly at the growth cone during  
198 axon regeneration.

199

## 200 **8. CaMKII regulates the F-actin length in neuronal growth cone**

201 The status of F-actin is known to be regulated by CaMKII in dendritic spines [24]. In addition,  
202 our results suggest that CaMKII mainly regulates local cytoskeleton assembly at the growth cone  
203 during axon regeneration. Accordingly, we next examined the relationship between the growth  
204 cone F-actin status and CaMKII activity. First, our immunofluorescence staining showed that  
205 phosphor-CaMKII is located at the frontier tip of the tubulin (Fig. 8A), and co-localized with  
206 F-actin (Fig. 8A). Furthermore, we found that inhibition of CaMKII activity with KN93  
207 significantly reduced the F-actin length (Fig. 8B, C). In contrast, activation of CaMKII with



208 cadmium chloride increased F-actin length (Fig. 8 B, C). Thus, it is probable that CaMKII  
209 regulates mammalian axon growth by affecting F-actin length in the growth cone.

210

211

212

213

214

215

216

217

218

219

220

221

222

223

224

225

226

227

228

229

230

231

232

233

## 234 **Discussion**

235       The global rates of nerve injury on account of trauma are exceedingly high, and loss of  
236 axonal continuity is a common problem associated with functional deficit. Thus, axon  
237 regeneration is a key determinant of functional recovery in the injured nervous system. Thus far,  
238 several molecules and signaling pathways have been identified that play a potential role in axon  
239 regeneration. However, the process of axon regeneration in the mammalian nervous system is  
240 very complex. The regenerative capacity of injured neurons is governed by both extrinsic and  
241 intrinsic factors. Therefore, axon regeneration in the mature mammalian nervous system is often  
242 poor, especially in the CNS neurons.

243       Herein, we found that peripheral axonal injury increases the phosphorylation level of  
244 CaMKII in DRG neurons of adult mice. CaMKII is one of the most prominent protein kinases,  
245 and calcium/calmodulin can bind to CaMKII and activate it through autonomous  
246 phosphorylation [25]. A previous study has shown that the influx of extracellular  $\text{Ca}^{2+}$  is one of  
247 the first phenomenon that occurs following axonal injury [17]. Thus, it is possible that a  
248 peripheral axotomy-induced increase in the concentration of intracellular calcium ions activates  
249 CaMKII in DRG neurons. In addition, one study reported that inhibition of calcium influx will  
250 reduce the regenerative axon growth in the sensory neurons of *Caenorhabditis elegans* [14].  
251 Similarly, the results of our pharmacological or genetic silencing study showed that inhibition of  
252 CaMKII activity impairs mammalian axon regeneration both in vitro and in vivo. More  
253 importantly, we also found that activation of CaMKII activity is sufficient to promote embryonic  
254 CNS and adult PNS neuronal axon growth in vitro. Additionally, the axons of injured CNS  
255 neurons usually form retraction bulbs with a disorganized network of growth cone cytoskeleton  
256 elements such as microtubules [20]. Previous studies have shown that stabilization of  
257 microtubules with taxol promotes axon regeneration after optic nerve and spinal cord injury [8,  
258 9]. Our result also indicates that activation of CaMKII with  $\text{CdCl}_2$  prevents injury-induced axon  
259 retraction after spinal cord injury. Thus, our results showed that CaMKII is an important

260 regulator of axon regeneration, and its activity is required for mammalian axon  
261 regeneration, both in vitro and in vivo.

262 It is well known that axon elongation is achieved by cytoskeletal elements and assembly of  
263 membrane components at the nerve growth cone. Another study showed that CaMKII was  
264 co-located and interacted with F-actin in the growth cone [26]. CaMKII $\beta$  also contains a binding  
265 region for F-actin [27], and regulates its stability [28, 29]. Thus, inhibition of CaMKII causes  
266 disorganization of the F-actin structure [26]. On the other hand, CaMKII can phosphorylate  
267 many microtubule-associated proteins [30]. For example, CaMKII can inhibit Cofilin functions  
268 through LIMK signaling [24], and Cofilin can regulate neuronal actin cytoskeleton by actin  
269 depolymerization [31]. Thus, it is possible that CaMKII regulates mammalian axon regeneration  
270 by affecting the growth cone cytoskeleton components such as F-actin distribution. First, we  
271 found that KN93 mainly inhibits the local cytoskeleton assembly-dependent axon growth, such  
272 as peripheral axotomy-induced axon growth. Furthermore, our results showed that F-actin and  
273 CaMKII co-localize at the tips of microtubules in the growth cone. Inhibition of CaMKII with  
274 KN93 significantly decreases the F-actin length in the growth cone. Conversely, activation of  
275 CaMKII with CdCl<sub>2</sub> markedly increases the F-actin length in the growth cone. Thus, our data  
276 suggested that CaMKII regulates mammalian axon regeneration by affecting F-actin distribution  
277 in the growth cone.

278 In conclusion, our results indicated that peripheral axotomy increases the phosphorylation  
279 level of CaMKII in DRG sensory neurons. Moreover, inhibition of CaMKII activity impairs PNS  
280 and CNS axon growth in vitro, and activation of CaMKII promotes PNS and CNS axon growth  
281 in vitro. Most importantly, our data also indicate that CaMKII activity involves peripheral  
282 sensory axon regeneration and cortical tract regeneration in vivo. Furthermore, we also found  
283 that CaMKII mainly regulates F-actin length in the growth cone during axon regeneration. Thus,  
284 taken together, these findings provide clear evidence that CaMKII is a critical modulator of  
285 mammalian axon regeneration.

## 286 **Materials and Methods**

### 287 **Animals and surgical procedure**

288 Thirty 8–10-week-old adult and six pregnant ICR mice were used. All animal experimental  
289 procedures were performed according to the animal protocol approved by the Institutional  
290 Animal Care and Use Committee of Soochow University. For surgical procedures, all mice were  
291 anesthetized with a mixture of ketamine (100 mg/kg) and xylazine (10 mg/kg) via  
292 intra-peritoneal (IP) injection. Eye ointment containing atropine sulfate was applied to protect  
293 the cornea during surgery, and animals received antibiotics for 24 h as post-operative analgesia.

### 294 **Reagents and antibodies**

295 KN93 and Blebbistatin were obtained from Selleck Chemicals. CdCl<sub>2</sub> was from  
296 Sigma-Aldrich. The anti-βIII tubulin (TUJ1) antibody was from Sigma-Aldrich. Primary  
297 antibody against β-actin and phospho-CaMKII were from Cell Signaling Technology. Alexa fluor  
298 ® plus 488 or 568 secondary antibodies were purchased from Life Technologies. Dextran biotin  
299 (BDA) was purchased from Life Technologies. Cy3-Streptavidin was from Jackson Laboratories.  
300 Actin-stain 555 Fluorescent Phalloidin was from Cytoskeleton. The siRNA against CaMKII $\gamma$  was  
301 from GenePharma (Shanghai, China) which targeted the following sequences:  
302 AACGTGGTACATAATGCTACA, CACAGTCACTCCTGAAGCTAA and  
303 ATCATTAAGATCACAGAACAA.

304

### 305 **Cell culture and in vitro electroporation**

306 Cell culture were performed as described in our previous study [32]. DRGs were isolated  
307 from 8–10-week-old adult mice and incubated with collagenase (1 mg/mL) at 37°C for 90 min,  
308 followed by 0.25% trypsin for 20 min. The DRG neurons were cultured in MEM medium  
309 containing 5% fetal bovine serum, 100 mg/mL penicillin and streptomycin. The embryonic  
310 cerebral cortical neurons isolated from embryos at E14.5, and hippocampal neurons were  
311 isolated from embryos at E18. Then, the embryonic cells were treated with 0.25% trypsin for 5

312 min and cultured in neurobasal medium supplemented with penicillin/streptomycin,  
313 GlutaMAX, and B27 supplements. Either adult DRG or embryonic dissociated cells were  
314 cultured on coverslips coated with poly-D-lysine (100 µg/mL) and laminin (10 µg/mL)  
315 mixture.

316 The siRNA were transfected via electroporation according to the manufacturer's  
317 protocol. The dissociated neurons were centrifuged to discard the supernatant, and  
318 re-suspended in 100 µL mixture of siRNA or/and EGFP and electroporation buffer. Then, it  
319 was transferred to a 2.0-mm electroporation cuvette and electroporated with an Amaxa™  
320 Nucleofector™ device. After electroporation, the cells were immediately mixed with the  
321 500-mL pre-warmed culture medium and plated into a 24-well plate that was coated with  
322 poly-D-lysine (100 µg/mL) and laminin (10 µg/mL). After 4 hour, when the neurons had  
323 adhered to the coverslips, the medium was replaced to remove residual electroporation  
324 buffer.

325

### 326 **Real-time quantitative polymerase chain reaction (RT-PCR)**

327 For RT-PCR, total RNAs were isolated with Trizol reagent (Invitrogen, Carlsbad, CA, USA) and  
328 reverse transcribed using Maxima H Minus Reverse Transcriptase (Thermo Scientific, Waltham,  
329 MA, USA). Quantitative PCR was performed using SYBR-Green Real-Time PCR Master Mix  
330 (Toyobo Co.; Osaka, Japan), and standard curves (cycle threshold values versus template  
331 concentration) were prepared for each target gene and the endogenous reference (18S) in each  
332 sample. The following primers were used:

333 CaMKII $\gamma$  forward: 5'-TACAGTGAAGCTGATGCCAG-3';

334 CaMKII $\gamma$  reverse: 5'-TTGACACCGCCATCTGACTT-3'

335

### 336 **Western blotting**

337 Tissues or cultured neurons were lysed with RIPA buffer for 30 min at 4°C. The protein  
338 concentration was measured by using the BCA Kit, and equal amount of extracted proteins were  
339 separated with 10% sodium dodecyl sulfate-polyacrylamide gel electrophoresis (SDS-PAGE).  
340 Next, the protein was transferred to a polyvinylidene difluoride (PVDF) membrane  
341 (Immobilon-P; Millipore). The membrane was blocked with 5% skimmed milk and incubated  
342 with primary antibodies overnight at 4°C, followed by incubation with the appropriate  
343 HRP-conjugated secondary antibody at room temperature for 1–2 hour. Afterwards, ECL Prime  
344 Western Blotting Detection Reagent (GE Healthcare; Chicago, IL, USA) was used to develop the  
345 membrane. ImageJ software was used to quantify the density of protein bands from three  
346 independent experiments.

347

#### 348 **Immunofluorescence staining**

349 For cultured neurons, the cells were fixed with 4% paraformaldehyde for 20 min and then  
350 blocked with 2% BSA and 0.1% Triton X-100 for 1 h, followed by incubating with primary  
351 antibody (anti-βIII-tubulin, 1:1000; phospho-CaMKII, 1:500) for 2 h, and secondary antibody  
352 for another 1 hour. To visualize the F-actin in growth cone, the DRG neurons were incubated  
353 with Actin-stain 555 fluorescent Phalloidin for 30 min. Then, the samples were again washed  
354 thrice in PBS and mounted with Mowiol®.

355 For immunohistostaining, the mice were anesthetized and transcardially perfused with 4%  
356 paraformaldehyde under deep anesthesia. The L3-L4 DRG tissue was dissected out and further  
357 fixed with 4% paraformaldehyde overnight at 4°C. The tissues were cryo-sectioned at 12-μm  
358 thickness. Then, the sections were blocked in PBS containing 10% FBS and 0.3% Triton X-100  
359 for 1 h and incubated over-night with anti-βIII-tubulin (TUJ1, 1:1000) antibody and  
360 phospho-CaMKII (1:500) antibody. Next day, the sections were washed thrice in PBS, and then  
361 incubated with fluorescent-labeled secondary antibody for 1 h. The samples were again washed  
362 thrice in PBS and mounted with Mowiol®.

363

### 364 **In vivo DRG electroporation**

365 In vivo electroporation was performed as described in our previous study [32]. After mice  
366 were anesthetized and the left side of the L3-L4 DRGs was exposed, a 1- $\mu$ l solution containing  
367 siRNA and/or GFP plasmid was carefully micro-injected into each DRG (pressure: 30 psi,  
368 duration: 8 ms) using a capillary pipette powered by Picospritzer III (Parker Inc., Cleveland,  
369 OH, USA). Electroporation was performed immediately after microinjection using tweezer-like  
370 electrodes ( $\varnothing$ 1.0 mm) and ECM830 electric transducers BTX (35 V, 15-ms pulse, and 950-ms  
371 interval). The skin was subsequently sutured. Two days later, a sciatic nerve crush injury was  
372 created on the ipsilateral side using fine forceps, and the injury site was marked with a 11-0 nylon  
373 epineural suture. After another three days, the mice were perfused with 4% paraformaldehyde,  
374 and the entire sciatic nerve was dissected out. Using AxioVision 4.7 software (Carl Zeiss  
375 MicroImaging, Inc.), the lengths of all EGFP-positive axons were measured manually from the  
376 crush site to the distal axon tips in whole-mounted tissue.

377

### 378 **Measure of axon length and F-actin length**

379 All images were captured with CCD camera controlled by AxioVision 4.7 software  
380 (Carl Zeiss MicroImaging, Inc.), and axon length was measured using the  
381 “measure/Curve/Outline” application. To quantify the axon length, neurons with axons more  
382 than twice the diameter of the cell body were counted and the longest axons of each neuron  
383 were tracked manually using the “measure/Curve/Outline” application. More than 100  
384 neuronal axons were measured in three independent experiments. For quantification of  
385 F-actin length in the growth cone, we measured the distance from the fluorescent  
386 phalloidin-labeled F-actin tips to TUJ1 labeled microtubules ends with the AxioVision 4.7  
387 software.

388

### 389 **Corticospinal tract tracing and axon retraction measuring**

390 To trace the cortical spinal tract, we injected BDA into the sensorimotor cortex as indicated  
391 indicated previously [33]. In brief, 14 days post injury, a total of 1.6  $\mu$ l 10% BDA in PBS was  
392 injected into the sensorimotor cortex of four sites (1.0 mm lateral; 0.5 mm deep into the cortex;  
393 and 1.0, 0.5, -0.5, and -1.0 posterior from the bregma) with a 5- $\mu$ l Hamilton micro syringe.  
394 Fourteen days after injection, mice were perfused with 4% PFA. Spinal cords were isolated and  
395 further fixed in PFA for 6 h at 4 °C. After dehydration in 30% sucrose, tissues were sectioned  
396 either sagittal or cross sectioned to give 25- $\mu$ m thick sections. Sections of spinal cords were  
397 stained with Cy3-Streptavidin (Jackson, 1:500) for 3 h. After washing with PBS thrice, sections  
398 were mounted with mounting solution to obtain photos using fluorescence microscopy. To  
399 measure axon retraction, distances from the axon tips to the center of the lesion site were  
400 measured. The averages of all axons of five sections the spinal cord were calculated and at least  
401 five mice were used for each group.

402

### 403 **Statistics**

404 Data are expressed as mean  $\pm$  standard error of the mean (SEM). “n” represents the number of  
405 independent experiments. The significant differences between groups were determined by single  
406 factor with *t*-test. Statistical significance was set to  $p < 0.05$  (\*:  $p < 0.05$ ; \*\*:  $p < 0.01$ ; \*\*\*:  
407  $p < 0.001$ ).

408

### 409 **Author Contributions**

410 F X, RJ X, JH X, WH W, JJ M, F W, YX M, SB Q, JC Z, HN Z, XZ Q, JQ C, B L, CM L, HL Y,  
411 B M, and Saijilafu designed the experiment. F X, JH X and WH W performed the experiments  
412 and analyzed the data. F X, RJ X and Saijilafu co-wrote the paper with all authors' input.



413

414 **Acknowledgements**

415 This work was supported by a grant from the the National Key Research and Development  
416 Program (No. 2016YFC1100203), National Natural Science Foundation of China (No. 81571189  
417 and No. 81772353 to Saijilafu), A Priority Academic Program Development of Jiangsu Higher  
418 Education Institutions, and An Innovation and Entrepreneurship Program of Jiangsu Province.  
419 Science & Technology Development Program of Suzhou City (to B M).

420

421 **Declaration of Interests**

422 The authors declare no competing financial interests.

423

424

425

426

427

428

429

430

431

432

433

434

435

436

437 **Figure legends**

438 **Figure 1: Peripheral axotomy increases phospho-CaMKII expression in DRG neurons**

439 (A) Compared to the naïve control group, p-CaMKII expression was increased in the DRG  
440 neurons after sciatic nerve axotomy. Green represents TUJ1 and red, p-CaMKII. Scale bar: 100  
441  $\mu\text{m}$ . (B) Results of western blotting showing increased p-CaMKII expression levels in DRGs  
442 seven days after sciatic nerve axotomy. (C) Quantification of p-CaMKII western blot band  
443 (normalized to actin,  $n = 3$ ).

444

### 445 **Figure 2: Inhibition of CaMKII activity prevents axon growth in adult DRG neurons**

446 (A) Inhibition of CaMKII activity with its pharmacological inhibitor KN93 significantly blocks  
447 phosphorylation level of CaMKII in DRG neurons. (B) Quantification of western blotting of (A).  
448 (C) KN93 treatment markedly inhibits the DRG neuronal axon growth in vitro in a  
449 dose-dependent manner. Neurons were stained with TUJ1 antibody, Scale bar: 200  $\mu\text{m}$ . (D)  
450 Quantification of the average axon length from three independent experiments ( $n=3$ ). (E) A  
451 specific siRNA against CaMKII $\gamma$  significantly blocks pan-CaMKII expression in the DRG  
452 neurons. (F) Quantification of siCaMKII $\gamma$  knocking down efficiency in (E). (G) Transfection of  
453 siCaMKII $\gamma$  markedly inhibits DRG neuronal axon growth. Scale bar: 20  $\mu\text{m}$ . (H) Quantification  
454 of the average axon length from three independent experiments ( $n=3$ ).

### 455 **Figure 3: CaMKII activity is required for the peripheral sensory axon regeneration in vivo**

456 (A) Representative images of axon regeneration in vivo following siCaMKII $\gamma$  transfection. Red  
457 arrowheads indicate the crush sites. Scale bar: 200  $\mu\text{m}$ . (B, C) Quantification of average length  
458 of EGFP-positive regenerating axons showing CaMKII $\gamma$  knock-down in DRG neurons  
459 significantly inhibits axon regeneration in vivo ( $n = 6$  mice for each).

### 460 **Figure 4: Inhibition of CaMKII activity impairs axon growth in embryonic CNS neurons.**

461 (A) Representative images showing that inhibition of CaMKII activity with the pharmacological  
462 inhibitor—2.5  $\mu\text{M}$  KN93—blocked cortical neuron axon growth. Scale bar: 100  $\mu\text{m}$ . (B)  
463 Quantification of the average axonal lengths of cortical neurons shown in (A) from three

464 independent experiments. (C) Representative images showing inhibition of CaMKII activity with  
465 the pharmacological inhibitor—2.5  $\mu$ M KN93—blocks hippocampal neuronal axon growth.  
466 Scale bar: 100  $\mu$ m. (D) Quantification of the average axonal lengths of hippocampal neurons  
467 shown in (C) from three independent experiments. (E) Representative images showing  
468 knockdown of CaMKII activity with a specific siCaMKII $\gamma$  blocks cortical neuron axon growth.  
469 Scale bar: 20  $\mu$ m. (F) Quantification of the average axonal lengths of cortical neurons shown in  
470 (E) from three independent experiments. (G) Representative images showing knockdown of  
471 CaMKII activity with a specific siCaMKII $\gamma$  blocks hippocampal neuron axon growth. Scale bar:  
472 20  $\mu$ m. (H) Quantification of the average axonal lengths of hippocampus neurons shown in (G)  
473 from three independent experiments.

474

475 **Figure 5: Activation of CaMKII activity promotes axon growth in adult DRG and**  
476 **developing CNS neurons**

477 (A) Western blot images showing that phospho-CaMKII expression level is increased in adult  
478 DRG neurons after administration of 10.0  $\mu$ M CdCl<sub>2</sub>. (B) Quantification of p-CaMKII level in  
479 (A). (C) Activation of CaMKII with 10.0  $\mu$ M CdCl<sub>2</sub> promotes adult DRG neuronal axon growth  
480 in vitro. Scale bar: 200  $\mu$ m. (D) Quantification of the average axonal lengths of adult DRG  
481 neurons shown in (C) from three independent experiments. (E) Activation of CaMKII with 10.0  
482  $\mu$ M CdCl<sub>2</sub> promotes axon growth of embryonic cortical neurons. All neurons were stained with  
483 TUJ1 antibody. Scale bar: 200  $\mu$ m. (F) Quantification of the average axonal lengths of adult  
484 DRG neurons shown in (E) from three independent experiments. (G) Activation of CaMKII with  
485 10  $\mu$ M CdCl<sub>2</sub> promotes axon growth of embryonic hippocampal neurons. Scale bar: 200  $\mu$ m. (H)  
486 Quantification of the average axonal lengths of adult DRG neurons shown in (G) from three  
487 independent experiments.

488 **Figure 6: Activation of CaMKII with CdCl<sub>2</sub> prevents injury-induced axon retraction of the**  
489 **cortical spinal tract**

490 (A) Representative images of sagittal sections of the spinal cord from intra-peritoneal injection  
491 of CdCl<sub>2</sub> or vehicle every day for 4 weeks. White dot line: lesion site; Green arrow: retraction  
492 bulbs. Scale bar: 200 μm. (B) Measurement of distances of the nearest axon tip from the injury  
493 site showing that CdCl<sub>2</sub> treatment significantly prevented injury-induced axon retraction.

494

495 **Figure 7: Inhibition of CaMKII activity prevents axotomy-induced axon growth in DRG**  
496 **neurons**

497 (A) Representative images showing only administration of 2.5 μM KN93 after replating blocks  
498 axon growth in adult DRG neurons. In contrast, administration of 2.5 μM KN93 before replating  
499 did not affect axon growth in adult DRG neurons. Scale bar: 200 μm. (B) Quantification of the  
500 average axon length in (A) from three independent experiments. (C) Representative images  
501 showing inhibition of CaMKII activity with the pharmacological inhibitor, KN93 (2.5 μM or 5.0  
502 μM), blocks axotomy-induced axon growth of adult DRG neurons. Scale bar: 200 μm. (D)  
503 Quantification of the average axon length in (C) from three independent experiments.

504

505 **Figure 8: CaMKII affects the F-actin length in growth cone**

506 (A) Immunofluorescence staining showing that phosphor-CaMKII is located at the frontier tip of  
507 the tubulin, and co-localizes with F-actin in the DRG neuronal growth cones. Scale bar: 5 μm. (B)  
508 Representative images of F-actin staining after treatments of KN93 or CdCl<sub>2</sub>. Scale bar: 5 μm. (C)  
509 Quantification of F-actin length showing that inhibition of CaMKII activity with KN93  
510 significantly reduces the F-actin length; in contrast, activations of CaMKII with CdCl<sub>2</sub> increase  
511 the F-actin length.

512

513 **References:**

- 514 1. Fu SY, Gordon T, . **Contributing factors to poor functional recovery after delayed nerve repair: prolonged**  
515 **axotomy.** *Journal of Neuroscience* 1995, **15**(2):3876-3885.
- 516 2. Glenn Y, Zhigang H: **Glial inhibition of CNS axon regeneration.** *Nature Reviews Neuroscience* 2006,  
517 **7**(8):617.
- 518 3. Qiu J, Cai D, Dai H, Mcatee M, Hoffman PN, Bregman BS, Filbin MT: **Spinal Axon Regeneration Induced by**  
519 **Elevation of Cyclic AMP.** *Neuron* 2002, **34**(6):895-903.
- 520 4. Kevin Kyungsuk P, Kai L, Yang H, Smith PD, Chen W, Bin C, Bengang X, Lauren C, Ioannis K, Mustafa S:  
521 **Promoting axon regeneration in the adult CNS by modulation of the PTEN/mTOR pathway.** *Science* 2008,  
522 **322**(5903):963-966.
- 523 5. Moore DL, Blackmore MG, Ying H, Kaestner KH, Bixby JL, Lemmon VP, Goldberg JL: **KLF family members**  
524 **regulate intrinsic axon regeneration ability.** *Science* 2009, **326**(5950):298-301.
- 525 6. Fu SY, Gordon T: **Contributing factors to poor functional recovery after delayed nerve repair: prolonged**  
526 **denervation.** *The Journal of neuroscience : the official journal of the Society for Neuroscience* 1995, **15**(5 Pt  
527 2):3886-3895.
- 528 7. Eun-Mi H, In Hong Y, Deok-Ho K, Justin B, Wen-Lin X, Nicovich PR, Raymond C, Andre L, Nitish T, Feng-Quan  
529 Z: **Engineering neuronal growth cones to promote axon regeneration over inhibitory molecules.** *Proc*  
530 *Natl Acad Sci U S A* 2011, **108**(12):5057-5062.
- 531 8. Farida H, Andres H, J?Rg R, Flynn KC, Laskowski CJ, Martina U, Kapitein LC, Dinara S, Vance L, John B:  
532 **Microtubule stabilization reduces scarring and causes axon regeneration after spinal cord injury.** *Science*  
533 2011, **331**(6019):928-931.
- 534 9. Sengottuvel V, Leibinger M, Pfreimer M, Andreadaki A, Fischer D: **Taxol facilitates axon regeneration in**  
535 **the mature CNS.** *Journal of Neuroscience* 2011, **31**(7):2688.
- 536 10. Shen Lin ML, Young-Jin Son, B. Timothy Himes, Diane M. Snow, Wenqian Yu, Peter W. Baas: **Inhibition of**  
537 **Kinesin-5, a Microtubule-Based Motor Protein, As a Strategy for Enhancing Regeneration of Adult Axons.**  
538 *Traffic* 2011, **12**(3):269-286.
- 539 11. Riviuccio MA, Brochier C, Willis DE, Walker BA, D'Annibale MA, Mclaughlin K, Siddiq A, Kozikowski AP,  
540 Jaffrey SR, Twiss JL: **HDAC6 is a target for protection and regeneration following injury in the nervous**  
541 **system.** *Proc Natl Acad Sci U S A* 2009, **106**(46):19599-19604.
- 542 12. Erondur NE, Kennedy MB: **Regional distribution of type II Ca<sup>2+</sup>/calmodulin-dependent protein kinase in**  
543 **rat brain.** *Journal of Neuroscience* 1985, **5**(12):3270-3277.

- 544 13. Blitzler RD, Wong T, Nouranifar R, Iyengar R, Landau EM: **Postsynaptic CAMP pathway gates early LTP in**  
545 **hippocampal CA1 region.** *Neuron* 1995, **15**(6):1403-1414.
- 546 14. Anindya GR, Zilu W, Alexandr G, Yishi J, Chisholm AD: **Calcium and cyclic AMP promote axonal**  
547 **regeneration in Caenorhabditis elegans and require DLK-1 kinase.** *Journal of Neuroscience* 2010,  
548 **30**(9):3175-3183.
- 549 15. Goshima Y, Ohsako S, Yamauchi T. **Overexpression of Ca<sup>2+</sup>/calmodulin-dependent protein kinase II in**  
550 **Neuro2a and NG108-15 neuroblastoma cell lines promotes neurite outgrowth and growth cone motility.**  
551 *Journal of Neuroscience the Official Journal of the Society for Neuroscience* 1993, **13**(2):559.
- 552 16. Williams EJ, Mittal B, Walsh FS, Doherty P: **A Ca<sup>2+</sup>/calmodulin kinase inhibitor, KN-62, inhibits neurite**  
553 **outgrowth stimulated by CAMs and FGF.** *Molecular and cellular neurosciences* 1995, **6**(1):69-79.
- 554 17. Mar FM, Bonni A, Sousa MM: **Cell intrinsic control of axon regeneration.** *Embo Reports* 2014, **15**(3):254.
- 555 18. Saijilafu, Hur EM, Liu CM, Jiao Z, Xu WL, Zhou FQ: **PI3K-GSK3 signalling regulates mammalian axon**  
556 **regeneration by inducing the expression of Smad1.** *Nature Communications* 2013, **4**(10):2690.
- 557 19. Ying L, Templeton DM: **Cadmium activates CaMK-II and initiates CaMK-II-dependent apoptosis in**  
558 **mesangial cells.** *Febs Letters* 2007, **581**(7):1481-1486.
- 559 20. Ali E, Farida H, Joana E, Frank B: **Disorganized microtubules underlie the formation of retraction bulbs**  
560 **and the failure of axonal regeneration.** *Journal of Neuroscience* 2007, **27**(34):9169-9180.
- 561 21. Seif GI, Hiroshi N, Tator CH: **Retrograde axonal degeneration "dieback" in the corticospinal tract after**  
562 **transection injury of the rat spinal cord: a confocal microscopy study.** *Journal of Neurotrauma* 2007,  
563 **24**(9):1513-1528.
- 564 22. P S F, A M: **Fate of severed cortical projection axons.** *Journal of Neurotrauma* 1993, **10**(4):457.
- 565 23. Mcphail LT, Stirling DP, Wolfram T, Kwiecien JM, Ramer MS: **The contribution of activated phagocytes and**  
566 **myelin degeneration to axonal retraction/dieback following spinal cord injury.** *European Journal of*  
567 *Neuroscience* 2015, **20**(8):1984-1994.
- 568 24. Okamoto K, Bosch M, Hayashi Y: **The roles of CaMKII and F-actin in the structural plasticity of dendritic**  
569 **spines: a potential molecular identity of a synaptic tag?** *Physiology* 2009, **24**(6):357-366.
- 570 25. Patodia S, Raivich G: **Downstream effector molecules in successful peripheral nerve regeneration.** *Cell &*  
571 *Tissue Research* 2012, **349**(1):15-26.
- 572 26. Easley CA, Faison MO, Kirsch TL, Lee JA, Seward ME, Tombes RM: **Laminin activates CaMK-II to stabilize**  
573 **nascent embryonic axons.** *Brain Research* 2006, **1092**(1):59-68.
- 574 27. Lin YC, Redmond L: **Neuronal CaMKII acts as a structural kinase.** *Commun Integr Biol* 2009, **2**(1):40-41.

- 575 28. Caran N, ., Johnson LD, Jenkins KJ, Tombes RM: **Cytosolic targeting domains of gamma and delta**  
576 **calmodulin-dependent protein kinase II**. *Journal of Biological Chemistry* 2001, **276**(45):42514-42519.
- 577 29. Fink CC, Karl-Ulrich B, Myers JW, Ferrell JE, Howard S, Tobias M: **Selective regulation of neurite extension**  
578 **and synapse formation by the beta but not the alpha isoform of CaMKII**. *Neuron* 2003, **39**(2):283-297.
- 579 30. Goldenring JR, Gonzalez B, ., Mcguire JS, Delorenzo RJ: **Purification and characterization of a**  
580 **calmodulin-dependent kinase from rat brain cytosol able to phosphorylate tubulin and**  
581 **microtubule-associated proteins**. *Journal of Biological Chemistry* 1983, **258**(20):12632.
- 582 31. Sarmiere PD, Bamburg JR: **Regulation of the neuronal actin cytoskeleton by ADF/cofilin**. *J Neurobiol* 2010,  
583 **58**(1):103-117.
- 584 32. Saijilafu, Hur EM, Zhou FQ: **Genetic dissection of axon regeneration via in vivo electroporation of adult**  
585 **mouse sensory neurons**. *Nature Communications* 2012, **2**(1):543-543.
- 586 33. Kai L, Yi L, Jae K L, Ramsey S, Rafer W, Ilse S-K, Andrea T, Kevin Kyungsuk P, Duo J, Bin C: **PTEN deletion**  
587 **enhances the regenerative ability of adult corticospinal neurons**. *Nature Neuroscience* 2010,  
588 **13**(9):1075-1081.
- 589

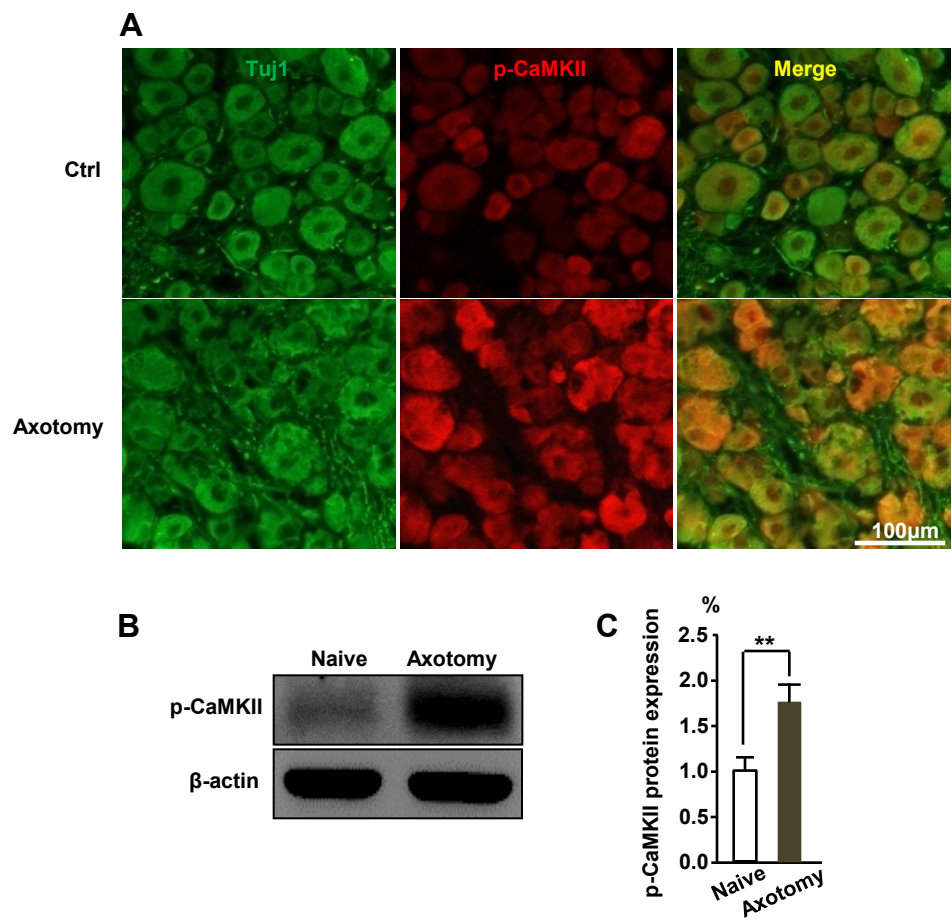

**Figure 1**



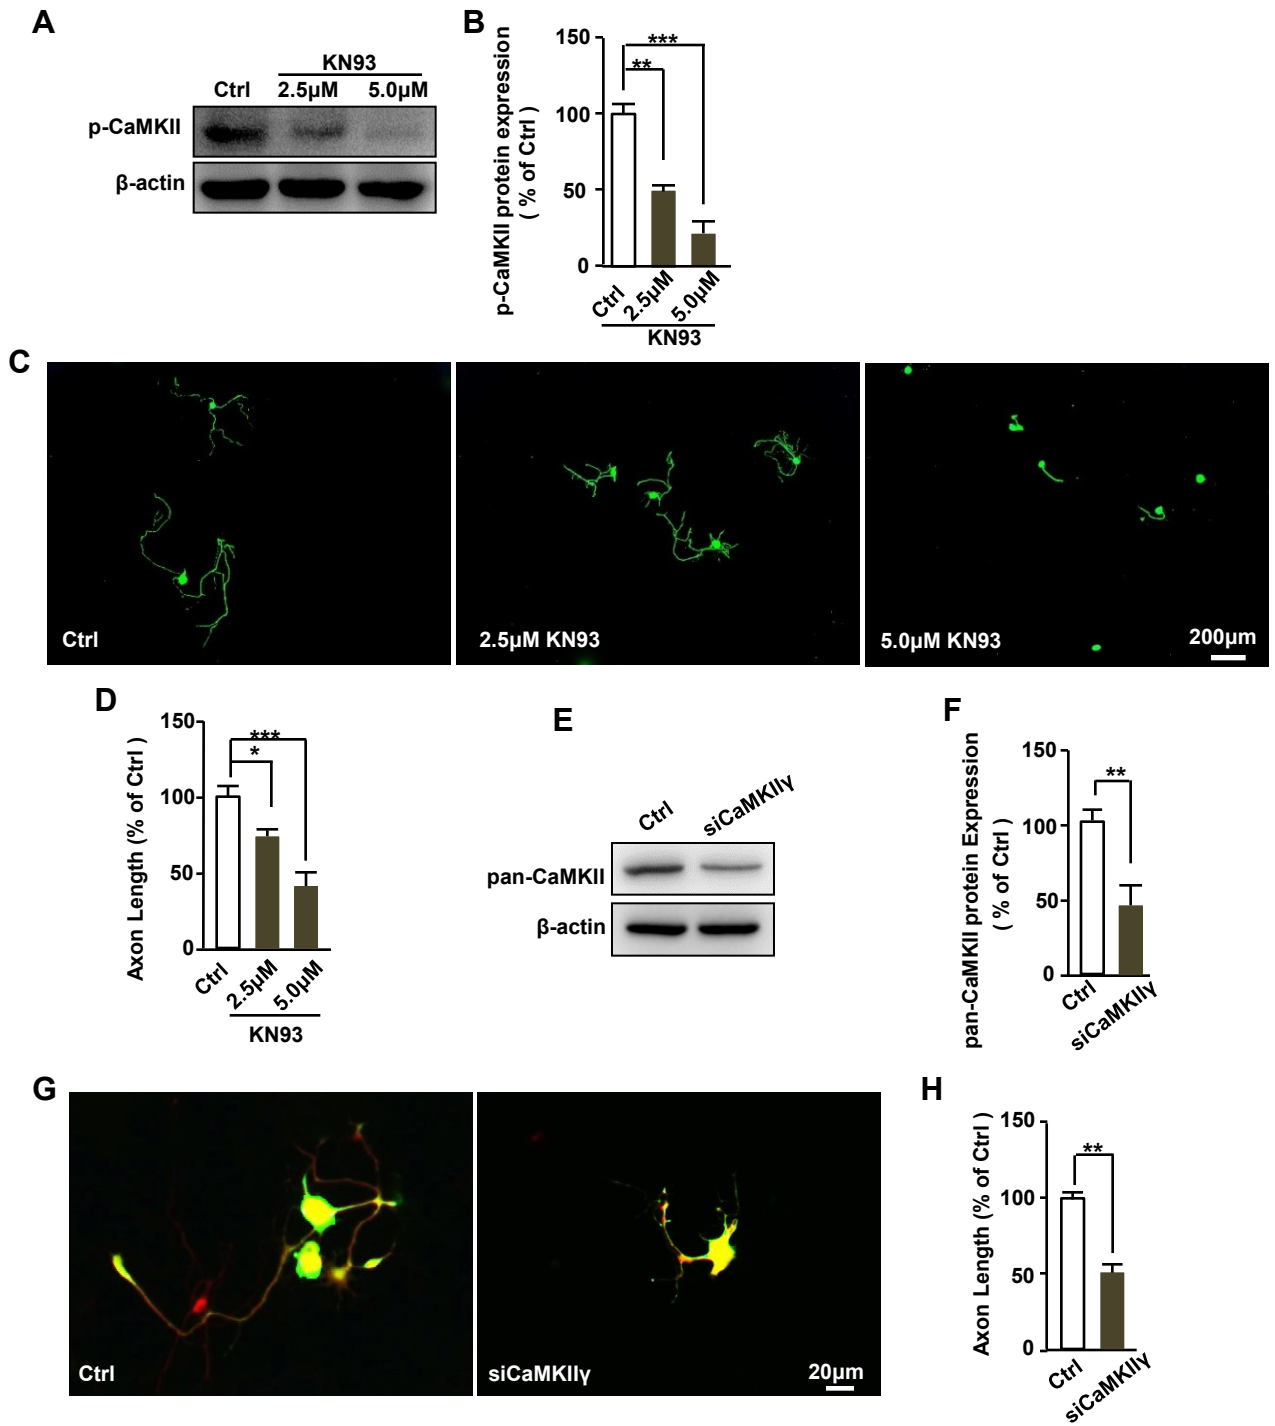

Figure 2

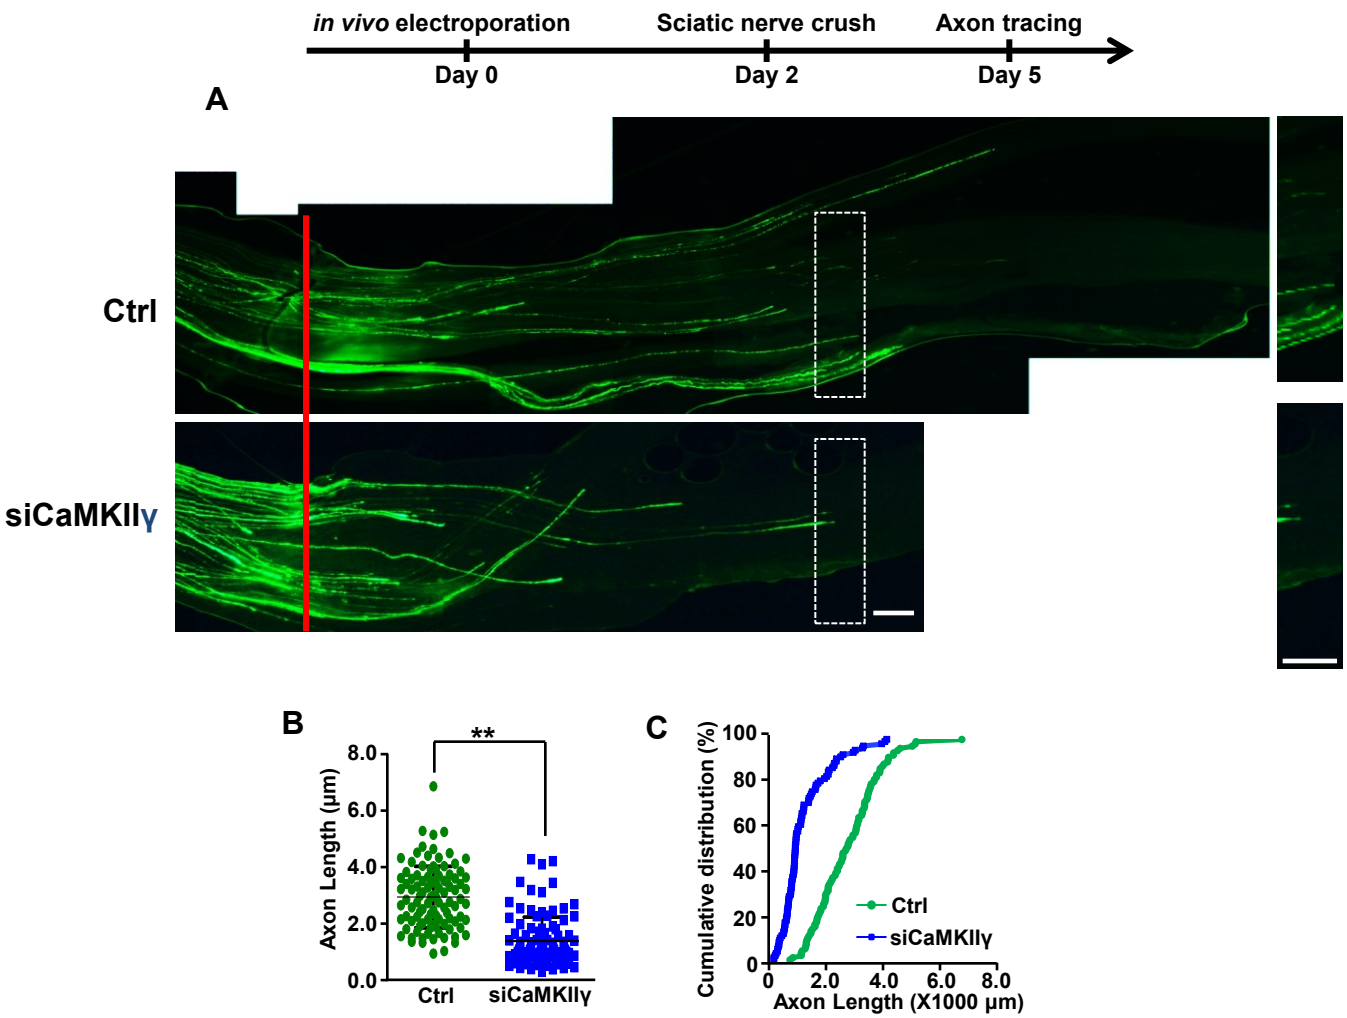

**Figure 3**

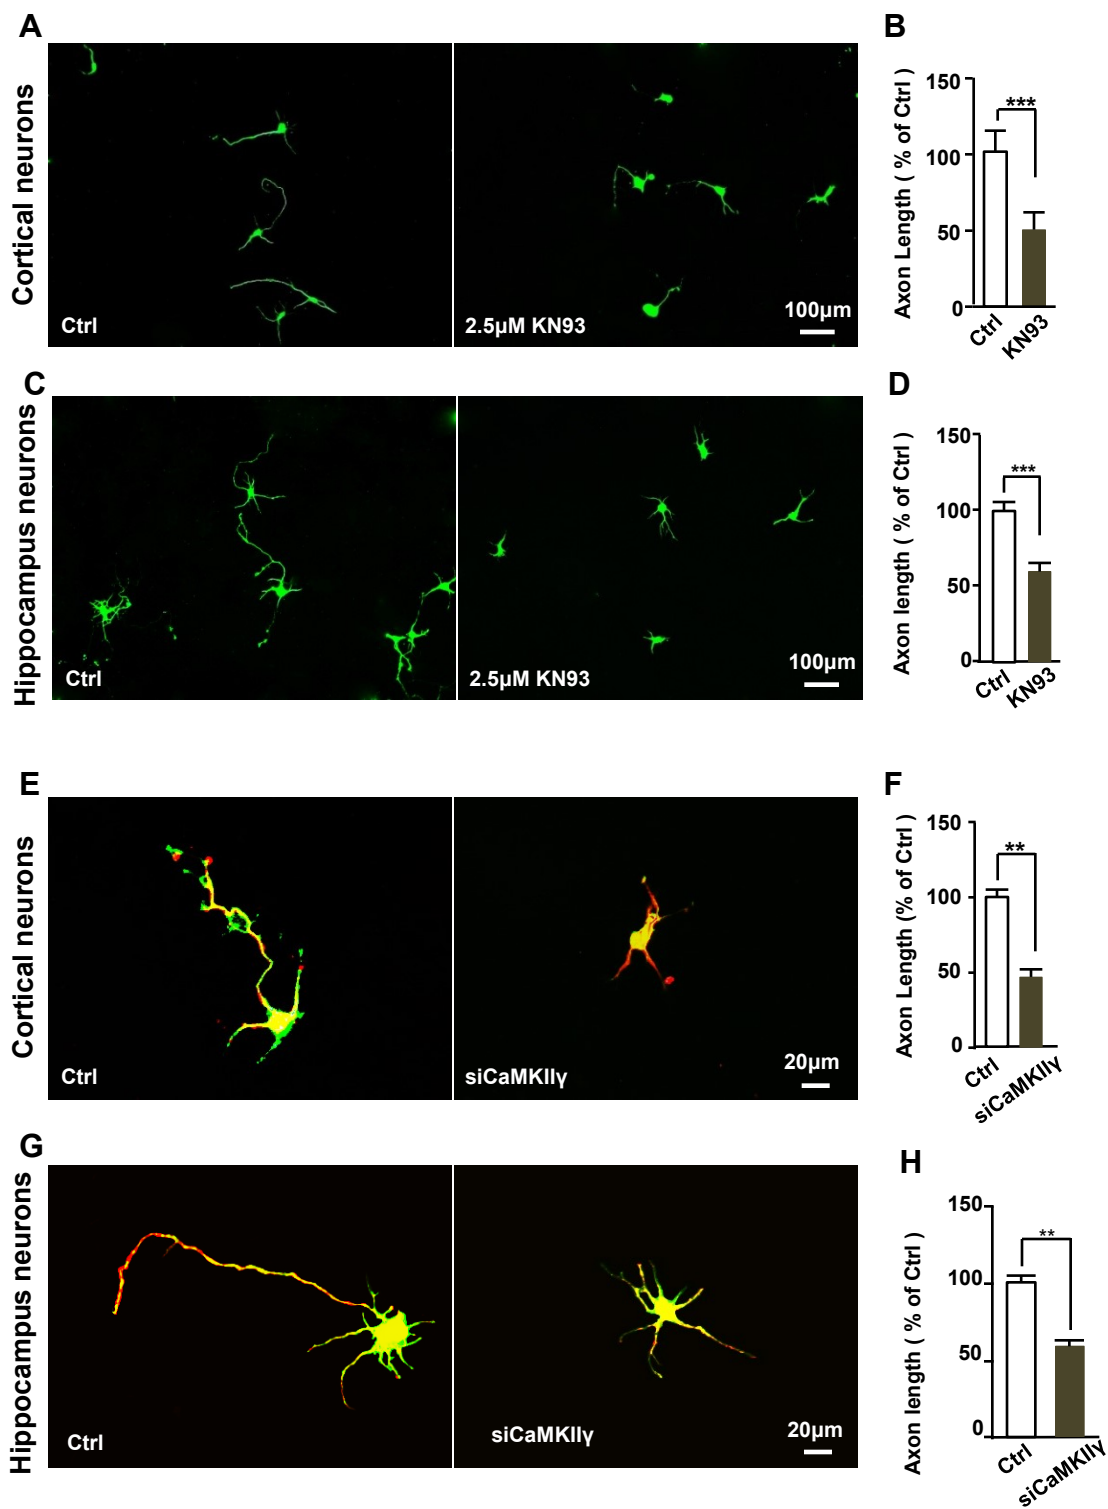

Figure 4

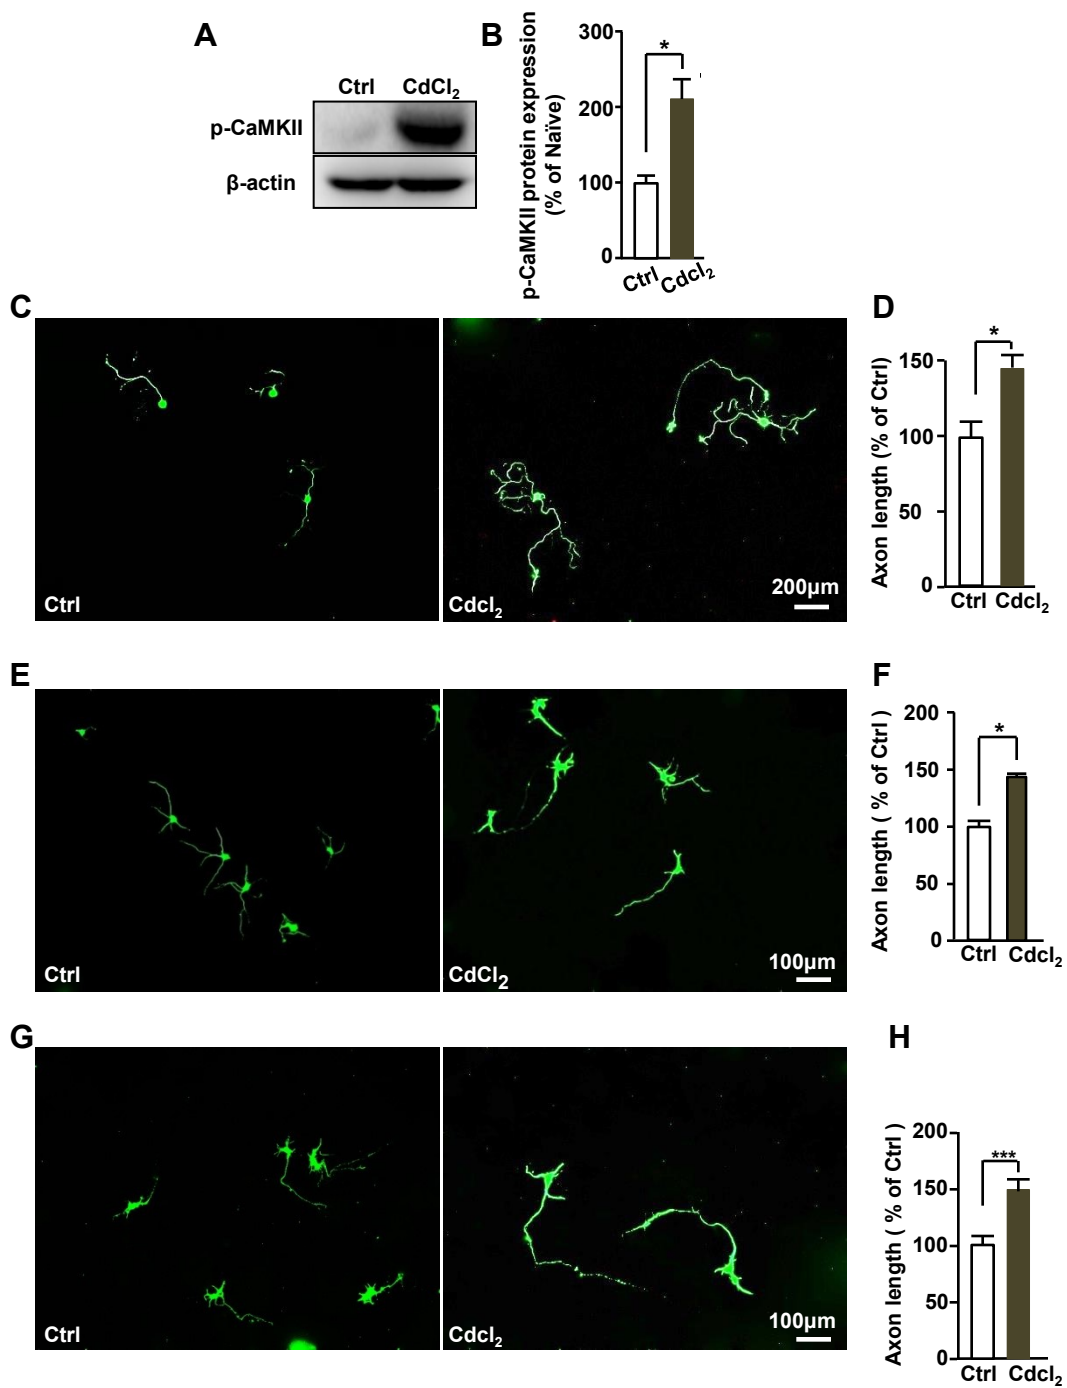

**Figure 5**

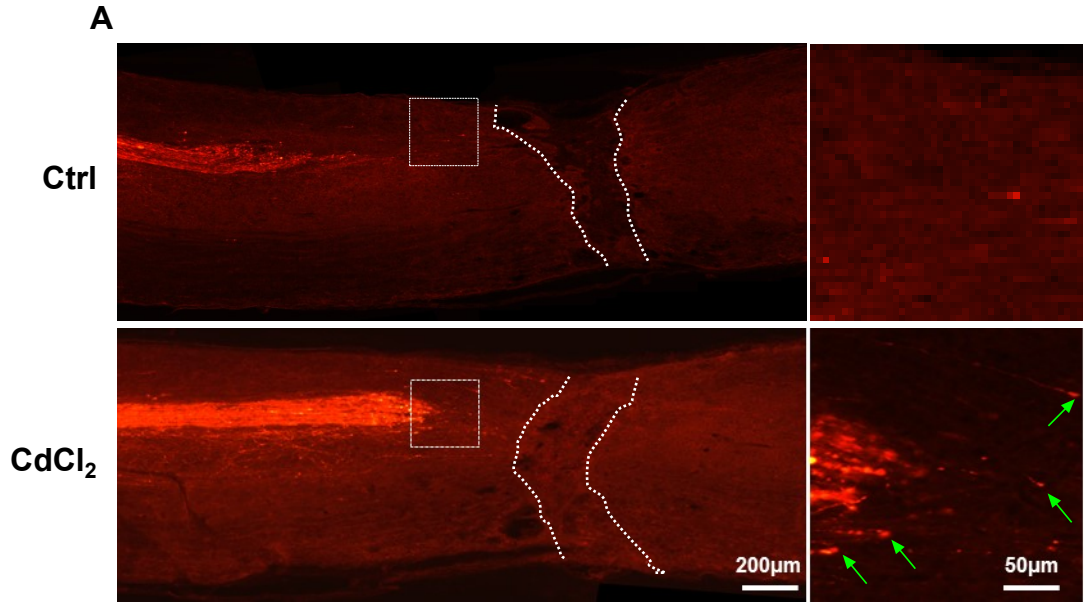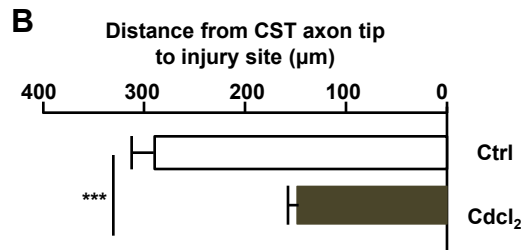

**Figure 6**

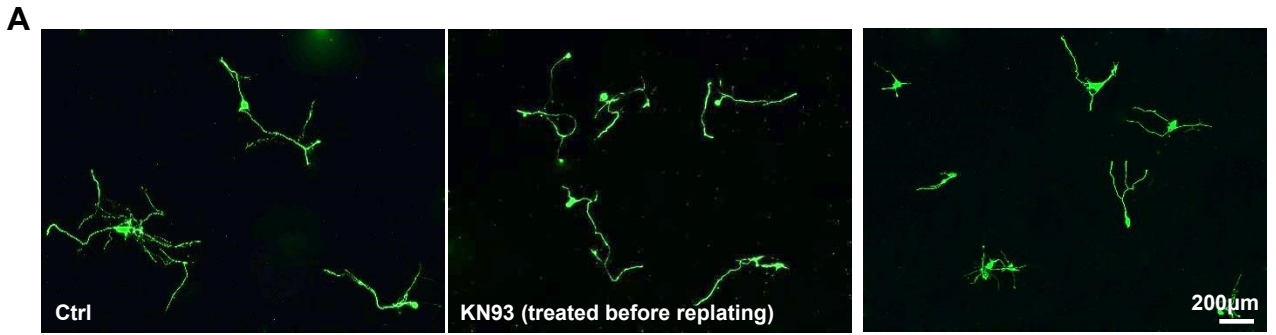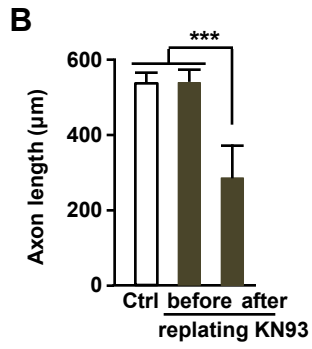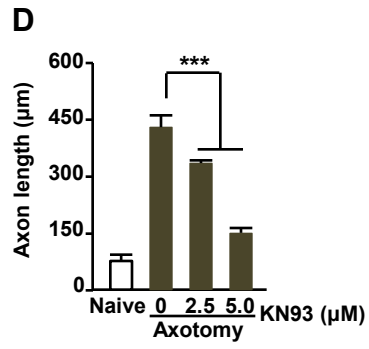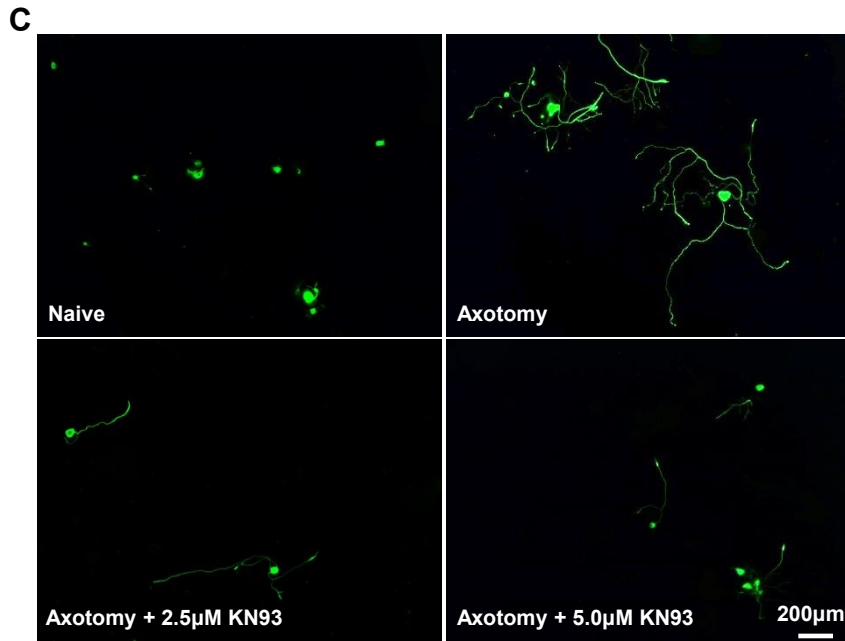

**Figure 7**

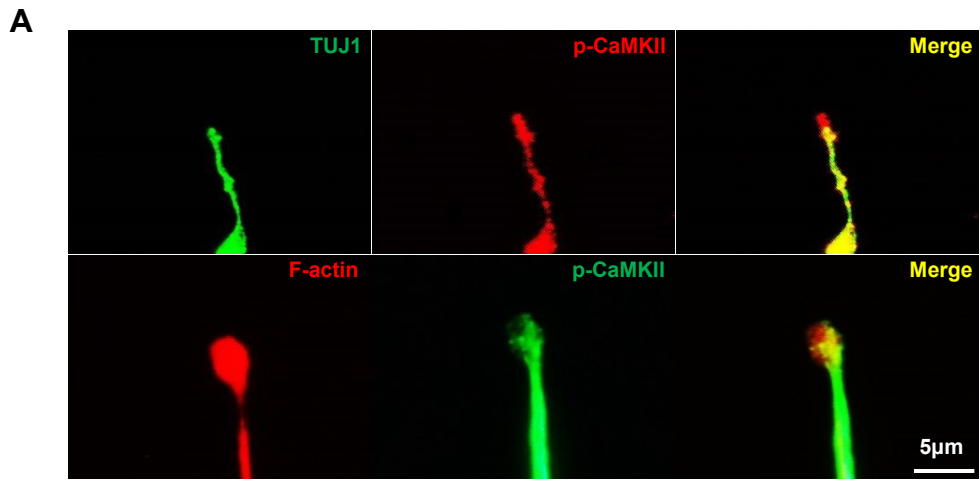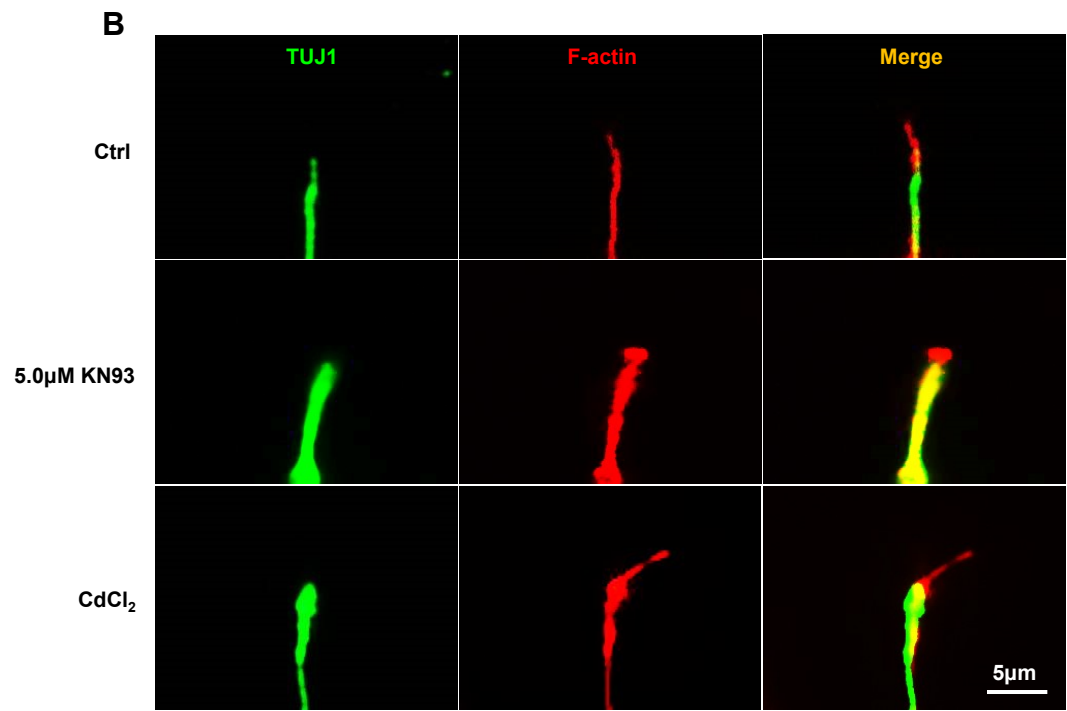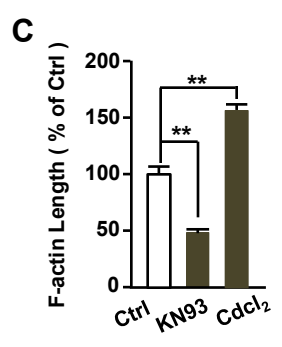

**Figure 8**
